# **The Wild Worm Codon Adapter: a web tool for automated codon adaptation of transgenes for expression in non-*Caenorhabditis* nematodes**

Astra S. Bryant\*, Elissa A. Hallem\*<sup>†</sup>

\* Department of Microbiology, Immunology, and Molecular Genetics, University of California, Los Angeles, CA 90095

<sup>†</sup> Molecular Biology Institute, University of California, Los Angeles, CA 90095

**Running title:** The Wild Worm Codon Adapter

**Keywords:** *Strongyloides*, *Brugia*, *Pristionchus*, *Nippostrongylus*, nematodes, codon optimization, introns, transgenesis

**Corresponding author:**

Elissa Hallem  
UCLA MIMG  
237 BSRB  
615 Charles E. Young Dr. S.  
Los Angeles, CA 90095  
(310) 825-1778  
ehallem@ucla.edu

## ABSTRACT

Advances in genomics techniques are expanding the range of nematode species that are amenable to transgenesis. Due to divergent codon usage biases across species, codon optimization is often a critical step for the successful expression of exogenous transgenes in nematodes. Platforms for generating DNA sequences codon optimized for the free-living model nematode *Caenorhabditis elegans* are broadly available. However, until now such tools did not exist for non-*Caenorhabditis* nematodes. We therefore developed the Wild Worm Codon Adapter, a tool for rapid transgene codon optimization for expression in non-*Caenorhabditis* nematodes. The app includes built-in optimization for parasitic nematodes in the *Strongyloides*, *Nippostrongylus* and *Brugia* genera as well as the predatory nematode *Pristionchus pacificus*. The app also supports custom optimization for any species using user-provided optimization rules. In addition, the app supports automated insertion of synthetic or native introns, as well as the analysis of codon bias in transgene and native sequences. Here, we describe this web-based tool and demonstrate how it may be used to analyze genome-wide codon bias in *Strongyloides* species.

## INTRODUCTION

Parasitic nematodes, including soil-transmitted gastrointestinal parasites in the genus *Strongyloides* and filarial nematodes such as *Brugia malayi*, are a major source of disease and economic burden (Lustigman *et al.* 2012). While *C. elegans* is often used as a model system for the study of parasitic nematodes, parasitic nematodes are behaviorally and genetically divergent from *C. elegans*; for example, they engage in a

number of parasite-specific behaviors such as host seeking, host invasion, and intra-host migration (Haas 2003; Gang and Hallem 2016). Establishing methods that allow researchers to genetically manipulate parasitic nematodes directly is critical for understanding the genetic and cellular basis of parasitism in these species.

Historically, the application of functional genomics techniques in parasitic nematodes has lagged behind their use in the free-living model nematode *Caenorhabditis elegans*, due to multiple factors including the limited availability of genomic information (Castelletto *et al.* 2020). Recently released high-quality reference genomes for many parasitic nematode species (Hunt *et al.* 2016; Howe *et al.* 2017; International Helminth Genomes Consortium 2019) are a critical resource for parasitic nematode functional genomics techniques such as transgenesis and CRISPR/Cas9-mediated mutagenesis (Lok *et al.* 2017; Castelletto *et al.* 2020; Liu *et al.* 2020). The generation of transgenic parasitic nematodes is an essential tool for mechanistic studies of parasite-specific behaviors (Bryant *et al.* 2018; Gang *et al.* 2020). As our technical understanding of nematode genomics continues to develop beyond *C. elegans*, establishing accessible tools that automate the transgene design process for a broad selection of nematode species will greatly facilitate the application of genomics techniques in these species.

Transgenesis protocols are increasingly well-established in non-*Caenorhabditis* nematode species, including three soil-transmitted gastrointestinal parasites in the *Strongyloidea* family – the human parasite *Strongyloides stercoralis*, the rodent parasite *Strongyloides ratti*, and the Australian brushtail possum parasite

*Parastrongyloides trichosuri* – as well as the rodent gastrointestinal parasite *Nippostrongylus brasiliensis*, the human-parasitic filarial nematode *Brugia malayi*, the predatory nematode *Pristionchus pacificus*, and the free-living nematodes *Auanema rhodensis* and *Auanema freiburgensis* (Grant *et al.* 2006; Lok *et al.* 2017; Adams *et al.* 2019; Castelletto *et al.* 2020; Han *et al.* 2020). Intragonadal microinjection, in which exogenous DNA is injected into either the syncytial gonad of free-living adult females (*Strongyloididae* species, *P. pacificus*), the distal gonad of free-living adult females (*Auanema* species), or the uterus of parasitic adult females (*B. malayi*), has been used to generate progeny expressing a range of transgenes (Schlager *et al.* 2009; Lok *et al.* 2017; Hong *et al.* 2019; Adams *et al.* 2019; Castelletto *et al.* 2020; Carstensen *et al.* 2020; Han *et al.* 2020). Intragonadal microinjection has also been used to achieve CRISPR/Cas9-mediated mutagenesis in *S. stercoralis*, *S. ratti*, *P. pacificus*, and *Auanema* species (Witte *et al.* 2015; Lok *et al.* 2017; Gang *et al.* 2017; Bryant *et al.* 2018; Adams *et al.* 2019; Han *et al.* 2020). In *B. malayi*, transfection of infective larvae has been used to deliver reporter plasmids and CRISPR constructs (Liu *et al.* 2018, 2020). Most recently, lentiviral transduction of infective larvae was used to deliver RNA interference molecules and drive expression of fluorescent reporters in *N. brasiliensis* (Hagen *et al.* 2021).

In non-*Caenorhabditis* nematodes and other species, successful transgene expression often requires the use of species-specific preferred codons. Codon usage bias is pervasive in species from all taxa, including nematodes: most amino acids may be encoded by multiple synonymous codons, and individual species tend to favor a specific

set of codons, particularly for encoding highly expressed genes (Sharp and Li 1987; Mitreva *et al.* 2006; Cutter *et al.* 2006). The use of preferred codons is thought to promote efficient translation, although the exact mechanisms are not clear (Plotkin and Kudla 2011). Codon usage bias is believed to regulate the expression of exogenous transgenes as well as endogenous genes (Redemann *et al.* 2011). In non-*Caenorhabditis* nematodes, expression of exogeneous genes from transgenes is promoted by the use of species-specific codon usage patterns (Han *et al.* 2020; Hagen *et al.* 2021).

Although the process of codon-adapting transgenes for *C. elegans* is simplified by web-based platforms (Grote *et al.* 2005; Redemann *et al.* 2011), transgenes codon-adapted for other nematode species were previously designed by hand. Therefore, we created a web-based application, the Wild Worm Codon Adapter, which automates the process of codon optimization for transgenic expression in non-*Caenorhabditis* nematode species. Furthermore, the application permits automated insertion of synthetic or native introns into codon-optimized cDNA sequences, inclusion of which can significantly increase gene expression (Junio *et al.* 2008; Li *et al.* 2011; Crane *et al.* 2019; Han *et al.* 2020). Finally, the app enables users to rapidly assess relative codon bias of transgene sequences, as well as native *Strongyloides* and *C. elegans* genes, using genus-specific codon adaptation indices.

## MATERIALS AND METHODS

### Data source and preferred codon selection

Codon usage rules for *Strongyloides*, *Brugia*, *Nippostrongylus*, and *C. elegans* were calculated based on previously published codon count data (File S1). For *Strongyloides*, count data are from 11,458 codons from the 50 most abundant *S. ratti* expressed sequence tag (EST) sequences (Mitreva *et al.* 2006). For *C. elegans*, data are from 178 genes (73,164 codons) with the highest bias toward translationally optimal codons (Sharp and Bradnam 1997). For *Brugia* and *Nippostrongylus*, count data from 6,483 *B. malayi* sequences (561,296 codons) and 650 *N. brasiliensis* sequences (75,934 codons) were retrieved from Nematode.net v.4.0 (Martin *et al.* 2015).

Count data was used to quantify the relative adaptiveness of individual codons: the frequency that codon “i” encodes amino acid “AA” ÷ the frequency of the codon most often used for encoding amino acid “AA” (Sharp and Li 1987; Jansen *et al.* 2003). Preferred codons were defined as the codon with the highest relative adaptiveness value for each amino acid. Preferred codons for *Pristionchus* species (File S1) are based on the codon usage bias of the top 10% of expressed genes (Han *et al.* 2020).

### **Codon adaptation index**

The codon biases of individual sequences are quantified by calculating a Codon Adaptation Index (CAI), defined as the geometric average of relative adaptiveness of all codons in the sequence (Sharp and Li 1987; Jansen *et al.* 2003). CAI values relative to species-specific relative adaptiveness values are calculated using the seqinr package v3.6-1. CAI values are not calculated relative to *Pristionchus* or user-provided

optimization rules, since in these cases optimal codons are defined directly rather than after calculating relative adaptiveness from count data.

## Fractional G-C content

The fraction of G+C bases in a sequence is calculated using the seqinr package v3.6-1.

## Intron insertion

Intron sequences are either: the three canonical artificial intron sequences used for *C. elegans* (Xu *et al.* 1996), *P. pacificus* native introns (Han *et al.* 2020), or Periodic A<sub>n</sub>/T<sub>n</sub> Cluster (PATC)-rich introns from the *C. elegans* gene *smu-2* (introns 3-5) (Aljohani *et al.* 2020). For intron placement, the optimized cDNA sequence is divided at three predicted intron insertion sites spaced approximately equidistantly. Insertion sites are predicted *C. elegans* exon splice sites: preferably the stringent consensus sequences (5'-AAG<sup>^</sup>G-3', 5'-AAG<sup>^</sup>A-3', 5'-CAG<sup>^</sup>G-3', 5'-CAG<sup>^</sup>A-3'), however minimal consensus sequences (5'-AG<sup>^</sup>G-3', 5'-AG<sup>^</sup>A-3') are used if more stringent sites are not present or if there are fewer insertion sites than the requested number of introns (Meyer *et al.* 1997; Redemann *et al.* 2011). The user-specified number of introns (up to a maximum of three) are inserted into the sequence using the 5' insertion site first and continuing in the 3' direction (Crane *et al.* 2019; Han *et al.* 2020).

## cDNA sequence lookup

In “Analyze Sequences” mode, users may submit search terms including: stable gene IDs, *C. elegans* gene names, or matched gene IDs and cDNA sequences as either a



two-column .csv file or an .fa file. If users supply only gene IDs, either via a text box or file upload, the app first fetches the cDNA sequences from WormBase ParaSite via the biomaRt package v2.42.1 (Durinck *et al.* 2005, 2009). The following types of gene IDs may be used: stable gene or transcript IDs with prefixes “SSTP,” “SRAE,” “SPAL,” “SVE,” or “WB;” *C. elegans* stable transcript IDs; or *C. elegans* gene names prefaced with the string ‘Ce-’ (*e.g.*, *Ce-tax-4*).

### **Genome-wide codon bias and Gene Ontology (GO) analysis**

FASTA files containing all coding sequences (CDS) for *S. stercoralis*, *S. ratti*, *S. papillosus*, *S. venezuelensis*, *N. brasiliensis*, *B. malayi*, and *C. elegans* were downloaded from WormBase ParaSite (WBPS15) and analyzed using the app. For *C. elegans* and *Strongyloides* species, results were filtered to identify six functional subsets: the 2% of genes with highest and lowest *S. ratti* CAI values, the 2% of genes with the highest and lowest *C. elegans* CAI values, and the 2% of genes with highest and lowest RNA-seq expression in free-living females. Log<sub>2</sub> counts per million (CPM) expression in free-living adult females was downloaded from the *Strongyloides* RNA-seq Browser (Bryant *et al.* 2021). For statistical comparisons of the expression of the highest and lowest *Strongyloides*-codon-adapted genes, relative to all genes, a 2-way ANOVA (type III) with Tukey *post-hoc* tests was performed in R using the car package v3.0-8. GO analyses of functional subsets were performed using the gprofiler2 package v0.1.9, with a false discovery rate (FDR)-corrected *p*-value < 0.05. Commonly enriched GO terms in each subset were defined as GO terms that were enriched in all four of the *Strongyloides* species (or at least three *Strongyloides* species in the case of gene-

expression-based subsets) with an FDR-corrected  $p$ -value of  $\leq 0.001$ . For statistical comparisons of genome-wide CAI values and fractional G-C content between species, Kruskal-Wallis tests with *post-hoc* Dunn's tests were performed in R using the `dunn.test` package v1.3.5. For *post-hoc* Dunn's tests,  $p$ -values were corrected using the Bonferroni method.

## Data Availability

Preprocessing and analysis source code, plus codon frequency data, intron sequences, and supplemental files are available at:

<https://github.com/HallemLab/Bryant-and-Hallem-2021>

A web-hosted version of the app is available at:

[https://hallemlab.shinyapps.io/Wild\\_Worm\\_Codon\\_Adapter/](https://hallemlab.shinyapps.io/Wild_Worm_Codon_Adapter/)

App source code and deployment instructions are available at:

[https://github.com/HallemLab/Wild\\_Worm\\_Codon\\_Adapter](https://github.com/HallemLab/Wild_Worm_Codon_Adapter)

The following supplemental files have been uploaded to figshare. File S1 contains codon usage frequencies and optimal codons for: highly abundant *S. ratti* expressed sequence tag (EST) transcripts (Mitreva *et al* 2006), highly expressed *C. elegans* genes (Sharp and Bradnam 1997), highly expressed *P. pacificus* genes (Han *et al* 2020), *B. malayi* contig sequences (<http://www.nematode.net>) (Martin *et al.* 2015), *N. brasiliensis* contig sequences (<http://www.nematode.net>) (Martin *et al.* 2015), and all *S. ratti* ESTs

(Mitreva *et al* 2006). File S2 contains a code freeze for the Wild Worm Codon Adapter. File S3 contains gene IDs, CAI values, GC ratios, and GO term accession numbers of the 2% of genes with the highest and lowest CAI values for each *Strongyloides* species and *C. elegans*. File S4 contains GO analysis results for the 2% of genes with the highest and lowest CAI values for each *Strongyloides* species and *C. elegans*. File S5 contains GO terms significantly enriched in all four *Strongyloides* species for the highest (top 2%) and lowest (bottom 2%) *Strongyloides* codon-adapted sequences, as well as GO terms significantly enriched in at least three *Strongyloides* species for genes with the highest (top 2%) and lowest (bottom 2%) expression in free-living females.

## RESULTS AND DISCUSSION

### Software Functionality

The Wild Worm Codon Adapter app features two usage modes: “Optimize Sequences” mode and “Analyze Sequences” mode (Figures 1-2, File S2). “Optimize Sequences” mode automates the process of transgene codon adaptation and intron insertion. For codon optimization, the app features built-in preferred codons for four non-*Caenorhabditis* nematode genera for which transgenesis protocols are increasingly well-established: *Strongyloides*, *Nippostrongylus*, *Pristionchus*, and *Brugia*. This mode also supports custom codon optimization based on a user-provided list of preferred codons.

To generate codon-optimized sequences suitable for expression in *Strongyloides*, *Nippostrongylus*, *Brugia*, or *Pristionchus* species, users select the appropriate codon

usage rule and then submit cDNA or amino acid sequences via a text window or file upload. To codon-optimize transgenes for expression in any additional organism of interest, users may prefer to supply a custom list of preferred codons using the following format: a 2-column .csv file listing single-letter amino acid symbols and corresponding 3-letter optimal codon sequence; only one optimal codon should be provided per amino acid and stop codons should be designated using the '\*' symbol. An example custom preferred codon table is available to download from the website.

For *Strongyloides* and *Pristionchus* species, codon optimization is based on *S. ratti* and *P. pacificus* codon usage patterns (Mitreva *et al.* 2006; Han *et al.* 2020). Codon optimization for *Brugia* species is based on genome-wide codon bias in *B. malayi*. For *Nippostrongylus* species, optimization rules are based on *N. brasiliensis* codon usage biases. Codon usage is often well conserved between closely related nematode species (Mitreva *et al.* 2006; Han *et al.* 2020). Thus, codon usage rules generated from individual species are likely effective across closely related species (e.g., across members of a genus).

We calculated built-in codon usage rules for *Strongyloides* and *Pristionchus* from the codon usage patterns observed in highly expressed genes (Mitreva *et al.* 2006; Han *et al.* 2020), since the codon usage patterns of highly expressed genes are thought to correlate with higher protein expression (Sharp and Li 1987; Plotkin and Kudla 2011). However, the codon usage rules for highly expressed *S. ratti* genes are extremely similar to those observed across all *S. ratti* coding sequences (File S1). In contrast, the

preferred codon usage rules we implement for *Strongyloides*, *Pristionchus*, and *Brugia* are distinct from the *C. elegans* codon usage rules (File S1), consistent with observations that individual transgenes show limited expression across nematode species with divergent genomes (Hunt *et al.* 2016; Lok *et al.* 2017; Castelletto *et al.* 2020; Han *et al.* 2020).

Previous studies have suggested that highly divergent codon usage patterns between nematodes are driven in part by the extreme AT-richness of some nematode genomes (Mitrevva *et al.* 2006; Cutter *et al.* 2006; Hunt *et al.* 2016; Han *et al.* 2020). As expected, in *S. ratti* and *B. malayi*, which have AT-rich genomes, the preferred codons that comprise the built-in usage rules are AT-biased (preferred codon fractional G-C content: *S. ratti* = 0.33, *B. malayi* = 0.32, *N. brasiliensis* = 0.52, *P. pacificus* = 0.46, *C. elegans* = 0.52). Thus, codon optimization for expression in *Strongyloides* and *Brugia* species will likely yield AT-rich optimized sequences. Given the use of a single codon sequence per amino acid and the AT-bias in preferred codons for some species, users may want to eliminate repeated nucleotide patterns, hairpin loops, or unwanted restriction sites prior to final gene synthesis.

To insert introns into optimized cDNA sequences, users select the type and number of introns for insertion into the optimized sequence (up to three). Users may choose between three sets of unique intron sequences: canonical *C. elegans* artificial introns (Xu *et al.* 1996), *P. pacificus* native introns (Han *et al.* 2020), or Periodic A<sub>n</sub>/T<sub>n</sub> Cluster (PATC)-rich introns that enhance germline expression of transgenes in *C. elegans*

(Aljohani *et al.* 2020). The app identifies three putative intron insertion sites spaced approximately equidistantly within the optimized cDNA sequence, and inserts the user-specified type and number of introns (Xu *et al.* 1996; Meyer *et al.* 1997; Redemann *et al.* 2011). In *C. elegans* and *P. pacificus*, a single 5' intron is sufficient for intron-mediated enhancement of gene expression, whereas a single 3' intron is not (Crane *et al.* 2019; Han *et al.* 2020). Thus, when the user chooses to insert fewer than three introns, the three hypothetical insertion sites are filled as needed, starting from the 5' site.

The app displays the optimized sequence with and without introns; users may download these sequences as a .txt files. “Optimize Sequences” mode reports the fractional G-C content for the original and optimized sequences. When optimizing using *Strongyloides*, *Nippostrongylus*, or *Brugia* usage rules, the app also provides a measure of the codon usage bias for both the original and optimized cDNA sequences by reporting codon adaptation index (CAI) values relative to the selected usage rule. When optimizing using *Pristionchus* or user-provided optimization rules, since optimal codons are defined directly, the app does not calculate CAI values.

Finally, the “Analyze Sequences” mode (Figure 1) was designed to support descriptive analyses of transgene sequences as well as native *Strongyloides* or *C. elegans* coding sequences. To measure how well codon-adapted a transgene is for expression in *Strongyloides*, *Brugia*, *Nippostrongylus*, or *C. elegans*, users may submit the relevant cDNA sequence(s). For individual cDNA sequences, the following values are calculated

and displayed as a downloadable table: fractional G-C content; and codon adaptation index values relative to *Strongyloides*, *Brugia*, *Nippostrongylus*, and *C. elegans* codon usage rules (*Sr*-CAI, *Bm*-CAI, *Nb*-CAI, and *Ce*-CAI, respectively). When presented with a list of *Strongyloides* or *C. elegans* gene or transcript IDs, the app first retrieves associated cDNA sequences from WormBase ParaSite before calculating the quantifications listed above.

## Benchmarking and Example Usage

To benchmark the use of the codon adaptation index to quantify codon adaptiveness of native genes, we used “Analyze Sequences” mode to assess and compare genome-wide codon bias patterns in *Strongyloides* species, *B. malayi*, *N. brasiliensis*, and *C. elegans*. *P. pacificus* was not included because the app does not calculate CAI values relative to *P. pacificus* codon usage rules. Consistent with previous findings (Mitreva *et al.* 2006), we found that the distribution of genome-wide codon bias varied by genus, such that the genus-specific CAI values of *C. elegans* coding sequences were lower than those for parasitic species (Figure 3A;  $p < 0.0001$  for all comparisons to *C. elegans*, Kruskal-Wallis test with Dunn’s *post-hoc* tests). Also consistent with previous observations that *Strongyloides* genomes are highly AT-rich (Mitreva *et al.* 2006; Cutter *et al.* 2006; Hunt *et al.* 2016), we observed that *Strongyloides* coding sequences displayed lower fractional G-C content than *C. elegans*, *N. brasiliensis*, and *B. malayi* coding sequences (Figure 3B;  $p < 0.0001$  for *Strongyloides* species grouped together and compared to each remaining species, Kruskal-Wallis test with Dunn’s *post-hoc* tests). Together these observations emphasize the likely benefit of transgene codon-

optimization for promoting successful transgenesis in non-*Caenorhabditis* species. Finally, consistent with our use of *Strongyloides* codon usage rules based on highly abundant *S. ratti* ESTs, the highest and lowest *Strongyloides*-codon-adapted sequences generally displayed significantly higher and lower expression, respectively, in free-living female life stages relative to the expression of all genes in the genome (Figure 3C). However, the range of gene expression values between the highest and lowest codon-adapted sequences are largely overlapping; thus, the degree of codon adaptation exhibited by individual genes is not the sole determinant of mRNA expression level in these species.

Next, we used gene ontology (GO) analyses to assess the putative functions of the most highly or poorly *Strongyloides*-codon adapted coding sequences (defined as the top/bottom 2% of *Sr*-CAI values; Files S3, S4). For the highest *Strongyloides*-codon-adapted sequences, GO terms that are significantly enriched in all four *Strongyloides* species are primarily associated with structural integrity and ribosomal components (Figure 4A-B, File S5). As expected, given that the *Strongyloides* codon usage rules are based on highly abundant sequences, there is significant overlap between GO terms enriched in the top 2% of *Strongyloides*-codon-adapted sequences and GO terms enriched in the genes that are most highly expressed in free-living females (Figure 4B, File S5). Despite the differences between codon usage patterns in *Strongyloides* and *C. elegans*, GO terms enriched in the top 2% of *Strongyloides*-codon-adapted sequences are also significantly enriched in the top 2% of *C. elegans*-codon-adapted sequences (*i.e.*, *C. elegans* sequences that display high codon usage bias relative to *C. elegans*



codon usage rules) (Figure 4B). In contrast, for parasite sequences that are the least *Strongyloides*-codon-adapted, commonly enriched GO terms are associated with DNA metabolism and interactions (Figure 4C-D, File S5); these terms are not enriched in low-expressing *Strongyloides* genes or poorly *C. elegans*-codon-adapted *C. elegans* sequences (Figure 4D, File S5). Although the causes and consequences of codon bias are not fully understood (Sharp *et al.* 2010; Plotkin and Kudla 2011), our observations of a common set of GO terms enriched in both *Strongyloides*- and *C. elegans*-codon-adapted genes suggest that in nematodes, heightened codon bias reflects a non-random process that systematically imposes divergent codon usage patterns on genes associated with a common set of biological functions.

## CONCLUSIONS AND FUTURE DIRECTIONS

Codon optimization of transgenes significantly improves the likelihood of successful transgenesis in non-*Caenorhabditis* nematodes. Here, we present the Wild Worm Codon Adapter, a web-based tool designed to replicate and extend the functionality of popular codon-optimization tools to include non-*Caenorhabditis* nematode genera such as *Strongyloides*, *Pristionchus*, *Nippostrongylus*, and *Brugia* (Grote *et al.* 2005; Redemann *et al.* 2011). The open-source code is extendable; users may perform codon-optimization for an unlimited selection of species by providing a custom list of optimal codons, and additions to the list of built-in optimization rules can be implemented as requested. Going forward, we hope that the Wild Worm Codon Adapter will simplify the process of transgene design for researchers using functional genomics to study non-*Caenorhabditis* nematodes.

372

373

## ACKNOWLEDGMENTS

374 The authors would like to thank Dr. Stephanie DeMarco and Dr. Michelle Castelletto for  
375 helpful discussion, and Dr. Ruhi Patel for helpful comments on the manuscript.

376

377

## FUNDING INFORMATION

378 This work was supported by an A.P. Giannini Postdoctoral Fellowship (A.S.B.); and a  
379 Burroughs-Wellcome Fund Investigators in the Pathogenesis of Disease Award, HHMI  
380 Faculty Scholar Award, NIH R01 DC017959, and NIH R01 AI136976 (E.A.H.).

381

382

## CONFLICTS OF INTEREST

383 The authors declare no conflicts of interest.

384

385

## LITERATURE CITED

386 Adams, S., P. Pathak, H. Shao, J. B. Lok, and A. Pires-daSilva, 2019 Liposome-based  
387 transfection enhances RNAi and CRISPR-mediated mutagenesis in non-model  
388 nematode systems. *Sci Rep* 9: 483.

389 Aljohani, M. D., S. El Mouridi, M. Priyadarshini, A. M. Vargas-Velazquez, and C.  
390 Frøkjær-Jensen, 2020 Engineering rules that minimize germline silencing of  
391 transgenes in simple extrachromosomal arrays in *C. elegans*. *Nat Commun* 11:  
392 6300.

393 Bryant, A. S., F. Ruiz, S. S. Gang, M. L. Castelletto, J. B. Lopez *et al.*, 2018 A critical  
394 role for thermosensation in host seeking by skin-penetrating nematodes. *Curr*  
395 *Biol* 28: 2338–2347.

396 Bryant, A.S., S. S. DeMarco, and E. A. Hallem, 2021 *Strongyloides* RNA-seq Browser: a  
397 web-based software platform for on-demand bioinformatics analyses of *Strongyloides*  
398 species. Submitted to G3.

399

400 Carstensen, H. R., R. M. Villalon, J. Vertiz, N. Banerjee, E. A. Hallem *et al.*, 2020 The  
401 regulation of developmental diapause is coordinated with molting and olfaction.  
402 bioRxiv doi: 10.1101/2020.03.30.016311 (Preprint posted March 30, 2020).

403 Castelletto, M. L., S. S. Gang, and E. A. Hallem, 2020 Recent advances in functional  
404 genomics for parasitic nematodes of mammals. *J Exp Biol* 223: jeb206482.

405 Crane, M. M., B. Sands, C. Battaglia, B. Johnson, S. Yun *et al.*, 2019 *In vivo*  
406 measurements reveal a single 5'-intron is sufficient to increase protein  
407 expression level in *Caenorhabditis elegans*. *Sci Rep* 9: 9192.

408 Cutter, A. D., J. D. Wasmuth, and M. L. Blaxter, 2006 The evolution of biased codon  
409 and amino acid usage in nematode genomes. *Mol Biol Evol* 23: 2303–2315.

410 Durinck, S., Y. Moreau, A. Kasprzyk, S. Davis, B. De Moor *et al.*, 2005 BioMart and  
411 Bioconductor: a powerful link between biological databases and microarray data  
412 analysis. *Bioinformatics* 21: 3439–3440.

413 Durinck, S., P. T. Spellman, E. Birney, and W. Huber, 2009 Mapping identifiers for the  
414 integration of genomic datasets with the R/Bioconductor package biomaRt. *Nat*  
415 *Protoc* 4: 1184–1191.

416 Gang, S. S., M. L. Castelletto, A. S. Bryant, E. Yang, N. Mancuso *et al.*, 2017 Targeted  
417 mutagenesis in a human-parasitic nematode. *PLoS Pathog* 13: e1006675.

418 Gang, S. S., M. L. Castelletto, E. Yang, F. Ruiz, T. M. Brown *et al.*, 2020 Chemosensory  
419 mechanisms of host seeking and infectivity in skin-penetrating nematodes. *Proc*  
420 *Natl Acad Sci USA* 117: 17913–17923.

421 Gang, S. S., and E. A. Hallem, 2016 Mechanisms of host seeking by parasitic  
422 nematodes. *Mol Biochem Parasitol* 208: 23–32.

423 Grant, W. N., S. J. M. Skinner, J. Newton-Howes, K. Grant, G. Shuttleworth *et al.*, 2006  
424 Heritable transgenesis of *Parastrongyloides trichosuri*: a nematode parasite of  
425 mammals. *Int J Parasitol* 36: 475–483.

426 Grote, A., K. Hiller, M. Scheer, R. Münch, B. Nörtemann *et al.*, 2005 JCat: a novel tool  
427 to adapt codon usage of a target gene to its potential expression host. *Nucleic*  
428 *Acids Res* 33: W526–531.

429 Haas, W., 2003 Parasitic worms: strategies of host finding, recognition and invasion.  
430 *Zoology* 106: 349–364.

431 Hagen, J., P. Sarkies, and M. E. Selkirk, 2021 Lentiviral transduction facilitates RNA  
432 interference in the nematode parasite *Nippostrongylus brasiliensis*. *PLoS Pathog*  
433 17: e1009286.

434 Han, Z., W.-S. Lo, J. W. Lightfoot, H. Witte, S. Sun *et al.*, 2020 Improving transgenesis  
435 efficiency and CRISPR-associated tools through codon optimization and native  
436 intron addition in *Pristionchus* nematodes. *Genetics* 216: 947–956.

437 Hong, R. L., M. Riebesell, D. J. Bumbarger, S. J. Cook, H. R. Carstensen *et al.*, 2019  
438 Evolution of neuronal anatomy and circuitry in two highly divergent nematode  
439 species. *eLife* 8: e47155.

440 Howe, K. L., B. J. Bolt, M. Shafie, P. Kersey, and M. Berriman, 2017 WormBase  
441 ParaSite – a comprehensive resource for helminth genomics. *Mol Biochem*  
442 *Parasitol* 215: 2–10.

443 Hunt, V. L., I. J. Tsai, A. Coghlan, A. J. Reid, N. Holroyd *et al.*, 2016 The genomic basis  
444 of parasitism in the *Strongyloides* clade of nematodes. *Nat Genet* 48: 299–307.

445 International Helminth Genomes Consortium, 2019 Comparative genomics of the major  
446 parasitic worms. *Nat Genet* 51: 163–174.

447 Jansen, R., H. J. Bussemaker, and M. Gerstein, 2003 Revisiting the codon adaptation  
448 index from a whole-genome perspective: analyzing the relationship between  
449 gene expression and codon occurrence in yeast using a variety of models.  
450 *Nucleic Acids Res* 31: 2242–2251.

451 Junio, A. B., X. Li, H. C. Massey, T. J. Nolan, S. Todd Lamitina *et al.*, 2008  
452 *Strongyloides stercoralis*: cell- and tissue-specific transgene expression and co-  
453 transformation with vector constructs incorporating a common multifunctional 3'  
454 UTR. *Exp Parasitol* 118: 253–265.

455 Li, X., H. Shao, A. Junio, T. J. Nolan, H. C. Massey *et al.*, 2011 Transgenesis in the  
456 parasitic nematode *Strongyloides ratti*. *Mol Biochem Parasitol* 179: 114–119.

457 Liu, C., A. Grote, E. Ghedin, and T. R. Unnasch, 2020 CRISPR-mediated transfection of  
458 *Brugia malayi*. *PLoS Negl Trop Dis* 14: e0008627.

459 Liu, C., A. S. Mhashilkar, J. Chabanon, S. Xu, S. Lustigman *et al.*, 2018 Development of  
460 a toolkit for piggyBac-mediated integrative transfection of the human filarial  
461 parasite *Brugia malayi*. *PLoS Negl Trop Dis* 12: e0006509.

462 Lok, J. B., H. Shao, H. C. Massey, and X. Li, 2017 Transgenesis in *Strongyloides* and  
463 related parasitic nematodes: historical perspectives, current functional genomic  
464 applications and progress towards gene disruption and editing. *Parasitology* 144:  
465 327–342.

466 Lustigman, S., R. K. Prichard, A. Gazzinelli, W. N. Grant, B. A. Boatin *et al.*, 2012 A  
467 research agenda for helminth diseases of humans: the problem of helminthiasis.  
468 *PLoS Negl Trop Dis* 6: e1582.

- Martin, J., B. A. Rosa, P. Ozersky, K. Hallsworth-Pepin, X. Zhang *et al.*, 2015 Helminth.net: expansions to Nematode.net and an introduction to Trematode.net. Nucleic Acids Res 43: D698–D706.
- Meyer, B. J., T. Blumenthal, and D. L. Riddle (Eds.), 1997 *Cis*-splicing in worms, in *C. elegans* II, Cold Spring Harbor Laboratory Press.
- Mitreva, M., M. C. Wendl, J. Martin, T. Wylie, Y. Yin *et al.*, 2006 Codon usage patterns in Nematoda: analysis based on over 25 million codons in thirty-two species. Genome Biol 7: R75.
- Plotkin, J. B., and G. Kudla, 2011 Synonymous but not the same: the causes and consequences of codon bias. Nat Rev Genet 12: 32–42.
- Redemann, S., S. Schloissnig, S. Ernst, A. Pozniakowsky, S. Ayloo *et al.*, 2011 Codon adaptation-based control of protein expression in *C. elegans*. Nat Methods 8: 250–252.
- Schlager, B., X. Wang, G. Braach, and R. J. Sommer, 2009 Molecular cloning of a dominant roller mutant and establishment of DNA-mediated transformation in the nematode *Pristionchus pacificus*. Genesis 47: 300–304.
- Sharp, P. M., and K. R. Bradnam, 1997 Appendix 3: Codon Usage in *C. elegans*, in *C. elegans II*, edited by B. J. Meyer, T. Blumenthal, and D. L. Riddle. Cold Spring Harbor Laboratory Press.
- Sharp, P. M., L. R. Emery, and K. Zeng, 2010 Forces that influence the evolution of codon bias. Philos Trans R Soc Lond B Biol Sci 365: 1203–1212.
- Sharp, P. M., and W. H. Li, 1987 The Codon Adaptation Index - a measure of directional synonymous codon usage bias, and its potential applications. Nucleic Acids Res 15: 1281–1295.
- Witte, H., E. Moreno, C. Rödelberger, J. Kim, J.-S. Kim *et al.*, 2015 Gene inactivation using the CRISPR/Cas9 system in the nematode *Pristionchus pacificus*. Dev Genes Evol 225: 55–62.
- Xu, S.-Q., G. Seydoux, P. Okkema, J. Ahnn, B. Harfe *et al.*, 1996 Fire Lab Vector Kit.

## FIGURE LEGENDS

**Figure 1. A UI overview of the Wild Worm Codon Adapter app.** The overview shows user inputs, content displayed in the browser, and downloadable files. The application features two modes: Optimize Sequences (blue panels) and Analyze Sequences (red

panels) that are accessed via separate tabs in the browser window. The app also includes an About tab that presents methods information and a menu for downloading files. Available files include example input files as well as tables of species-specific optimal codons, species-specific codon frequencies, and relative adaptiveness values used to calculate codon adaptation indices.

**Figure 2. Detailed graphic view of the codebase of the Wild Worm Codon Adapter app.** The application features two usage modes: Optimize Sequences (upper, blue panel) and Analyze Sequences (lower, red panel). Grey boxes are preprocessed data inputs generated from published data. Red boxes are user inputs. Green boxes are output elements displayed within the browser; output values directly depend on inputs provided via red elements. Blue boxes are commands run in R. White boxes are code details or input options. Purple boxes are downloadable output file options. Dashed lines show division of code elements into the named files.

**Figure 3. Codon adaptiveness and GC content across species. A)** Density plot of codon adaptation index (CAI) values in a species' genome. Codon adaptiveness varies between species; *C. elegans* genome-wide codon adaptiveness is significantly lower than other species ( $p < 0.0001$  comparing *C. elegans* to each remaining species, Kruskal-Wallis test with Dunn's *post-hoc* tests). For each species, codon bias is calculated relative to the genus-level codon usage rules (File S1). **B)** Density plot of fractional GC content across species. Consistent with previous reports (Mitreva *et al.* 2006; Cutter *et al.* 2006; Hunt *et al.* 2016), *Strongyloides* coding sequences tend to be

more AT-rich than the coding sequences of other species ( $p < 0.0001$  for the grouped *Strongyloides* species versus each remaining species, Kruskal-Wallis test with Dunn's *post-hoc* tests). For both panels, values were calculated by submitting a list of all predicted coding sequences to the Wild Worm Codon Adapter app in Analyze Sequences mode. **C)** Violin plot of  $\log_2$  counts per million (CPM) expression in free-living females for all genes (grey), genes in the top 2% of CAI values for each species (red), and genes in the bottom 2% of CAI values for each species (blue). Dots indicate median values. \*\*\*\* $p < 0.00005$ , 2-way ANOVA with Tukey *post-hoc* tests.

**Figure 4. Functional enrichment of highly and poorly codon-adapted genes.** Gene Ontology (GO) enrichment across *Strongyloides* species for sequences displaying high and low degrees of *Strongyloides* codon bias. **A-B)** Manhattan plots and table showing GO enrichment for sequences in the top 2% of CAI values for each species. X-axis labels (A) and table Source values (B) indicate the three GO vocabulary categories: biological process (BP), molecular function (MP) and cellular component (CC). Numbered circles (A) and table ID numbers (B) indicate GO terms that are significantly enriched ( $p \leq 0.001$ ) in all four *Strongyloides* species. For Manhattan plots,  $-\log_{10}(p\text{-values})$  along the y-axis are capped if  $\geq 16$ ; this threshold is indicated by a grey dashed line. All GO terms included in panel B are also significantly enriched in the top 2% of *C. elegans*-codon-adapted *C. elegans* sequences. Red terms are also significantly enriched among genes with the highest expression (top 2%) in free-living females, in at least 3 *Strongyloides* species. **C-D)** Manhattan plots and table of GO enrichment for sequences that compose the bottom 2% of CAI values. None of the GO terms included



548 in panel D are also significantly enriched ( $p \leq 0.001$ ) in poorly *C. elegans*-codon-  
549 adapted *C. elegans* sequences or in genes with the lowest expression (bottom 2%) in  
550 free-living females. For all plots,  $p$ -values are false discovery rate (FDR)-corrected.



Figure 1

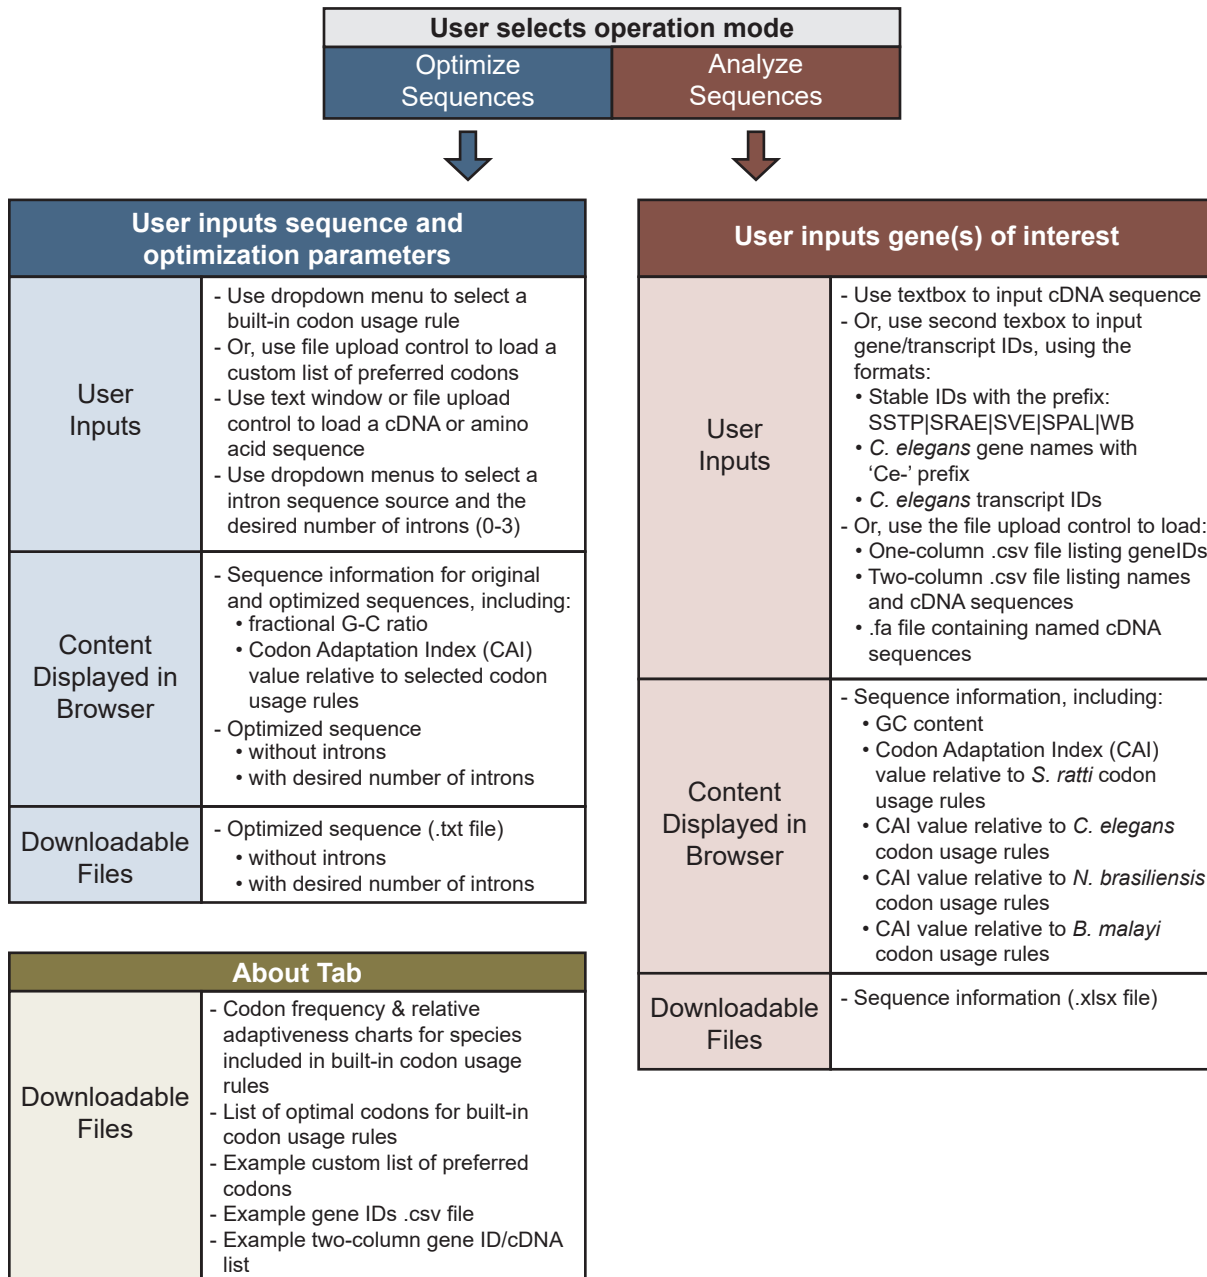

Figure 2

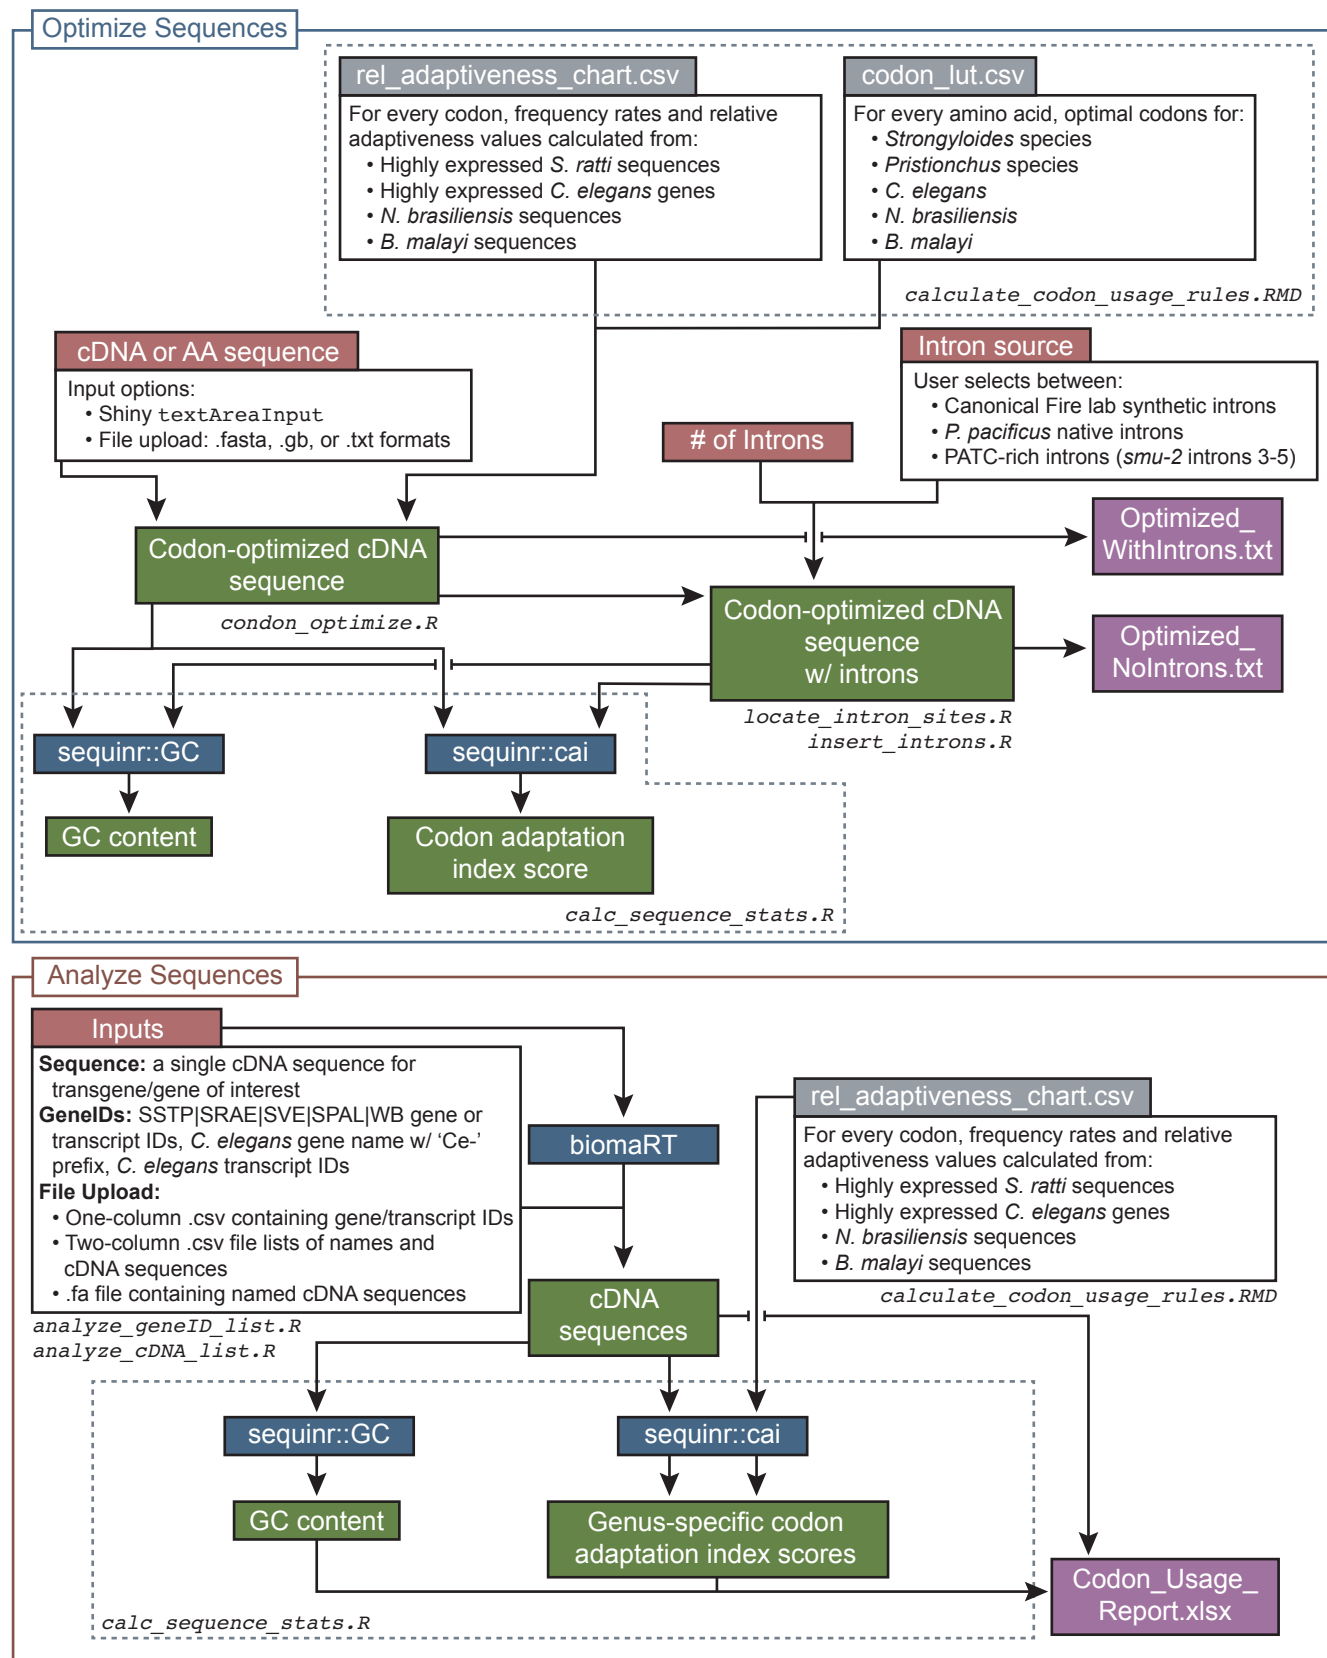

Figure 3

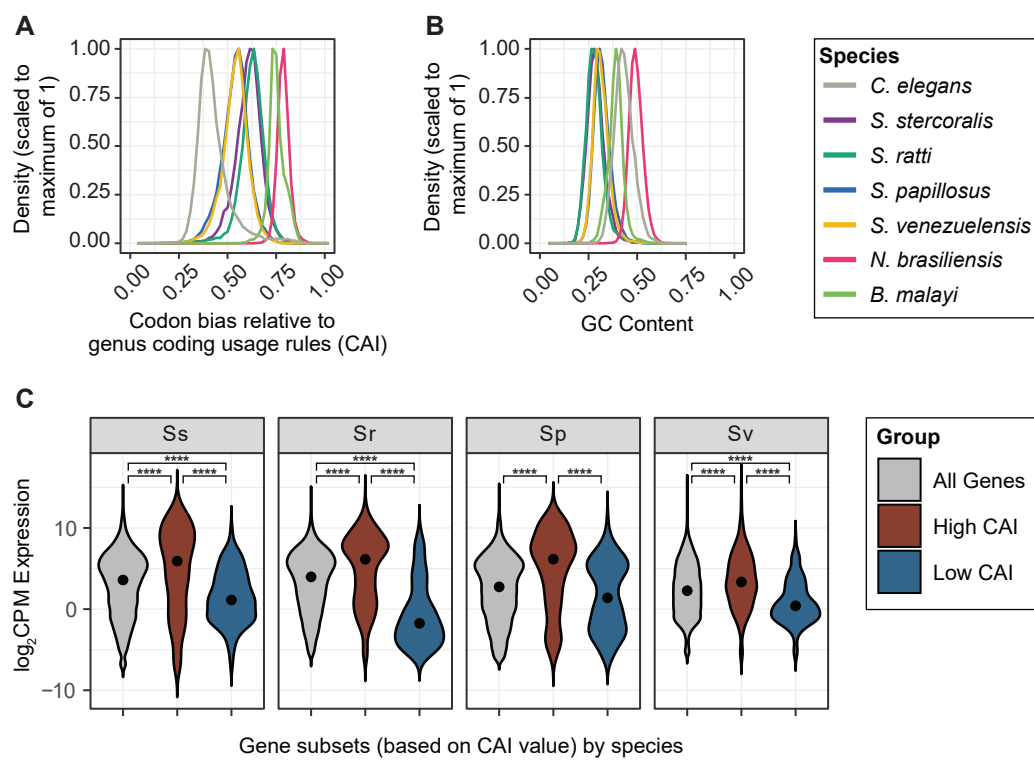

Figure 4

**A GO Analysis: 2% most *Strongyloides*-codon-adapted sequences**

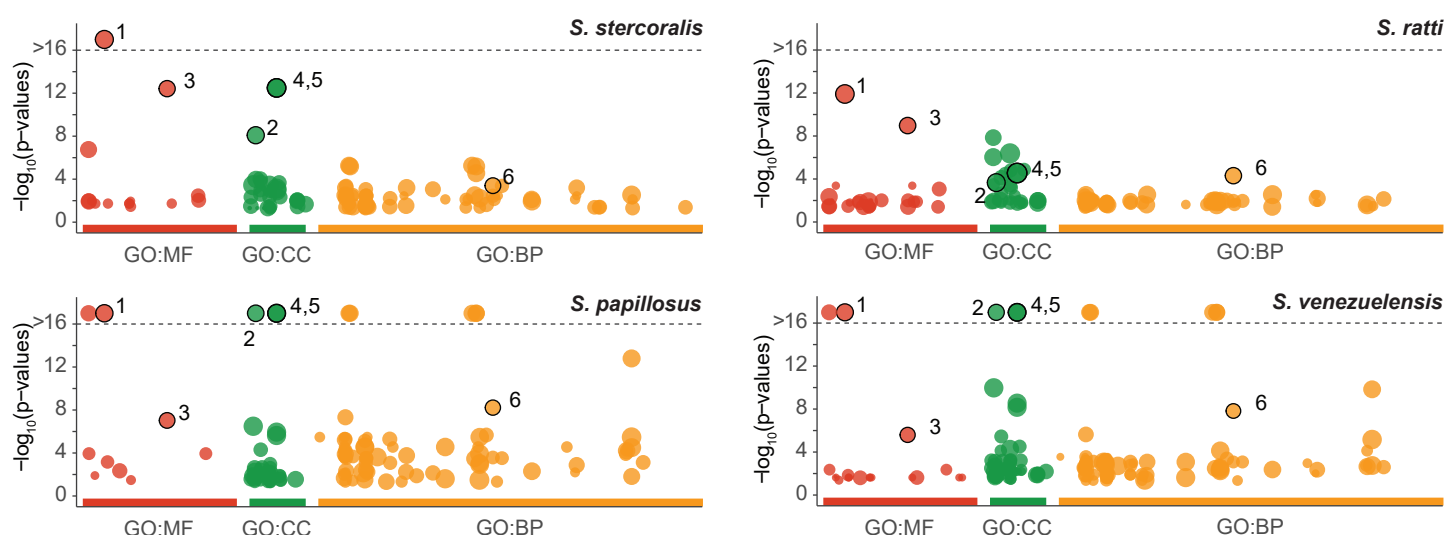

**B GO terms significantly enriched in all *Strongyloides* species ( $p < 0.001$ )**

| ID | Source | Term ID    | Term Name                                    |
|----|--------|------------|----------------------------------------------|
| 1  | GO:MF  | GO:0005198 | structural molecule activity                 |
| 2  | GO:CC  | GO:0005840 | ribosome                                     |
| 3  | GO:MF  | GO:0042302 | structural constituent of cuticle            |
| 4  | GO:CC  | GO:0043228 | non-membrane-bounded organelle               |
| 5  | GO:CC  | GO:0043232 | intracellular non-membrane-bounded organelle |
| 6  | GO:BP  | GO:0046034 | ATP metabolic process                        |

**C GO Analysis: 2% least *Strongyloides*-codon-adapted sequences**

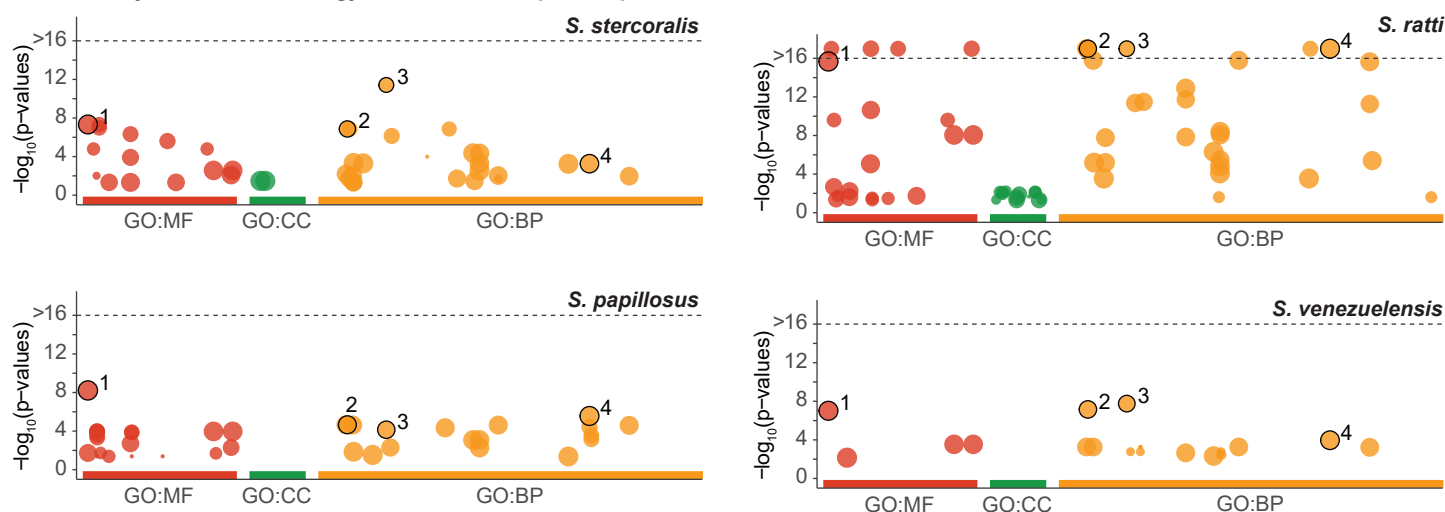

**D GO terms significantly enriched in all *Strongyloides* species ( $p < 0.001$ )**

| ID | Source | Term ID    | Term Name                      |
|----|--------|------------|--------------------------------|
| 1  | GO:MF  | GO:0003676 | nucleic acid binding           |
| 2  | GO:BP  | GO:0006259 | DNA metabolic process          |
| 3  | GO:BP  | GO:0015074 | DNA integration                |
| 4  | GO:BP  | GO:0090304 | nucleic acid metabolic process |
